# Supplementary material for: Serum Autoantibodies in Chronic Prostate Inflammation in Prostate Cancer Patients
Source: PubMed Central journal article supplement (PMC4749310; doi:10.1371/journal.pone.0147739), 2016-02-10
Supplement: pone.0147739.s001.pdf [file pone.0147739.s001.pdf]

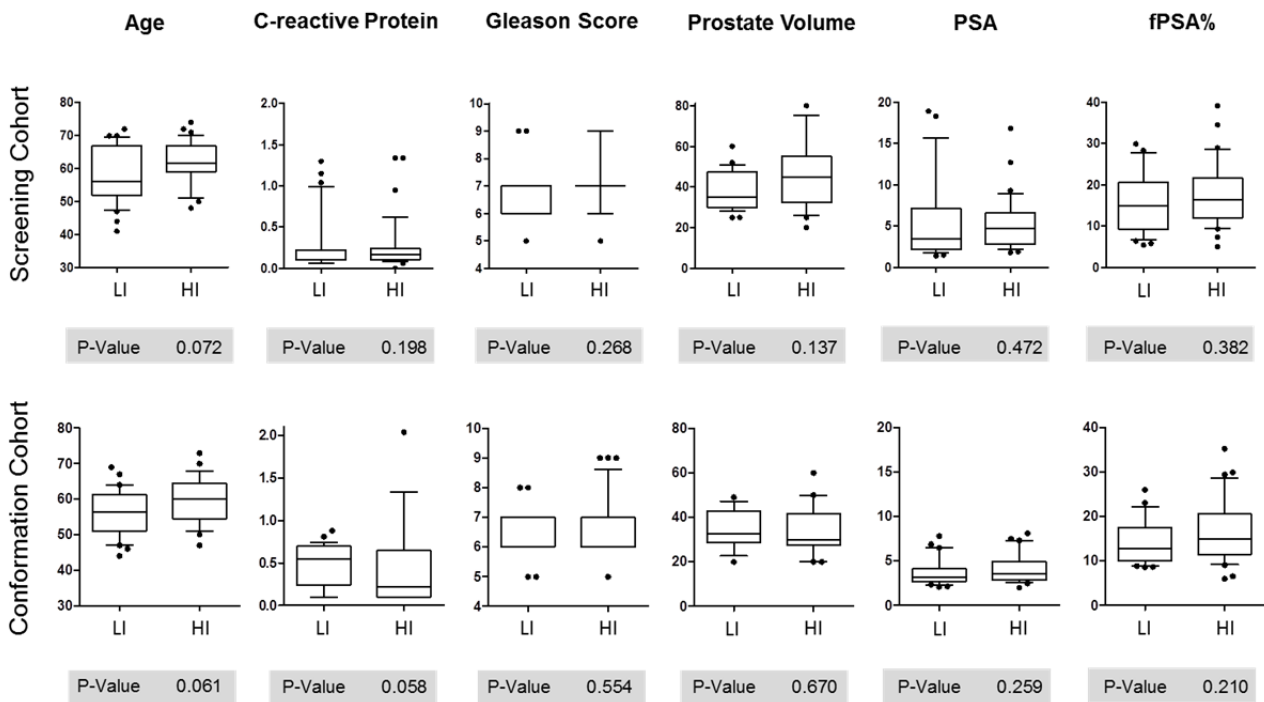

**S1 Fig. Clinical parameters are equally distributed between high and low inflammation patient cohorts.**

All samples were tested for statistically significant differences between the two sample groups. Clinical parameters including age, C-reactive protein, Gleason Score, prostate volume, PSA and free PSA (Table 1) are equally distributed amongst the high and low inflammation patient cohorts of the initial screen and the cross-validation set.  $P < 0.05$ , Mann-Whitney Test.
