# Supplementary material for: Serum Autoantibodies in Chronic Prostate Inflammation in Prostate Cancer Patients
Source: PLoS One. 2016 Feb 10;11(2):e0147739. doi: 10.1371/journal.pone.0147739 (PMC4749310; doi:10.1371/journal.pone.0147739)
Supplement: S2 Table — (XLSX) [file pone.0147739.s004.xlsx]

## Sheet: 165 autoantibodies
Autoimmunity and chronic prostate inflammation - Schlick B. et al.
S2 Table. List of 165 significantly upregulated autoantibodies in serum samples of the screening cohort, ranked according to P-value
Rank	Name	GI Accession	pValue	Fold Change
1	Homo sapiens spastin (SPAST); transcript variant 1; mRNA	gi|40806168	0.001	14.328
2	Homo sapiens ribosomal protein L36a-like (RPL36AL); mRNA	gi|34335143	0.001	5.156
5	FEZ family zinc finger 2 [Homo sapiens]	gi|157388917	0.002	0.158
6	Homo sapiens makorin. ring finger protein. 1 (MKRN1). mRNA	gi|21359891	0.002	11.192
7	acyl-CoA thioesterase 7 isoform hBACHd [Homo sapiens]	gi|32528286	0.003	6.108
8	Homo sapiens speckle-type POZ protein (SPOP) transcript variant 3 mRNA	gi|56117827	0.003	4.269
9	Homo sapiens chromosome 17 open reading frame 32 (C17orf32) mRNA	gi|22748978	0.004	10.382
10	Homo sapiens chromosome 17 open reading frame 32 (C17orf32) mRNA	gi|22748978	0.004	6.243
15	Homo sapiens ubiquitin-conjugating enzyme E2O (UBE2O); mRNA	gi|33636749	0.005	11.808
21	Homo sapiens coactosin-like 1 (Dictyostelium) (COTL1). mRNA	gi|23510452	0.007	7.443
22	Homo sapiens tetratricopeptide repeat domain 5 (TTC5); mRNA	gi|24308431	0.007	2.965
23	PREDICTED: Homo sapiens family with sequence similarity 59 member B (FAM59B) mRNA	gi|113413768	0.007	4.159
24	IKBE_HUMAN NF-kappaB inhibitor epsilon (NF-kappa-BIE) (I-kappa-B-epsilon) (IkappaBepsilon) (IKB-epsilon) (IKBE)	gi|14548073	0.007	3.588
25	Homo sapiens farnesyl diphosphate synthase (farnesyl pyrophosphate synthetase; dimethylallyltranstransferase; geranyltranstransferase) (FDPS); mRNA	gi|41281370	0.008	15.796
26	Homo sapiens cyclin-dependent kinase 7 (MO15 homolog; Xenopus laevis; cdk-activating kinase) (CDK7); mRNA	gi|16950659	0.008	22.018
27	low density lipoprotein receptor-related protein associated protein 1 [Homo sapiens]	gi|4505021	0.008	3.373
28	Homo sapiens surfeit 5 (SURF5); transcript variant c; mRNA	gi|31652217	0.008	9.334
30	PREDICTED: Homo sapiens similar to 60S ribosomal protein L21 transcript variant 2 (LOC731567) mRNA	gi|113422143	0.008	6.563
31	Homo sapiens methylmalonyl Coenzyme A mutase (MUT) nuclear gene encoding mitochondrial protein mRNA	gi|4557766	0.008	3.469
32	Homo sapiens tubulin. alpha 3 (TUBA3). mRNA	gi|17986282	0.008	13.3
33	Homo sapiens dehydrogenase/reductase (SDR family) member 13 (DHRS13) mRNA	gi|34147700	0.009	6.402
34	Homo sapiens G protein-coupled receptor 161 (GPR161); transcript variant 2; mRNA	gi|24476015	0.009	4.119
35	Homo sapiens chromosome 2 genomic contig; alternate assembly (based on Celera assembly)	gi|88958353	0.009	5.481
36	Homo sapiens NOL1/NOP2/Sun domain family; member 5 (NSUN5); transcript variant 2; mRNA	gi|23199996	0.009	3.031
37	Homo sapiens chromosome 9 genomic contig. reference assembly	gi|89029256	0.010	3.842
39	similar to homoprotocatechuate catabolism bifunctional isomerase/decarboxylase [Homo sapiens]	gi|14336767	0.010	2.566
40	PREDICTED: Homo sapiens similar to Myc-associated zinc finger protein (MAZI) (Purine-binding transcription factor) (Pur-1) (ZF87) (ZIF87) (LOC642773). mRNA	gi|113426244	0.011	5.002
41	Homo sapiens chromosome 9 genomic contig. reference assembly	gi|89029256	0.011	9.396
49	Homo sapiens upstream binding transcription factor. RNA polymerase I (UBTF). mRNA	gi|7657670	0.012	10.361
50	Homo sapiens APC11 anaphase promoting complex subunit 11 homolog (yeast) (ANAPC11). transcript variant 4. mRNA	gi|50409803	0.012	21.412
51	ribosomal protein L35a [Homo sapiens]	gi|16117791	0.012	16.386
52	Homo sapiens KIAA1576 protein (KIAA1576) mRNA	gi|24308256	0.013	4.061
53	Homo sapiens integrin alpha FG-GAP repeat containing 3 (ITFG3) mRNA	gi|14042969	0.013	6.278
54	myotonic dystrophy protein kinase isoform 1 [Homo sapiens]	gi|126091095	0.014	3.365
55	Homo sapiens hypothetical protein FLJ12949 (FLJ12949). transcript variant 2. mRNA	gi|30410780	0.014	3.919
56	Homo sapiens nerve growth factor receptor (TNFRSF16) associated protein 1 (NGFRAP1); transcript variant 2; mRNA	gi|46094059	0.014	11.314
57	Homo sapiens syntaxin 18 (STX18) mRNA	gi|39725935	0.014	7.819
58	Homo sapiens FERM; RhoGEF and pleckstrin domain protein 2 (FARP2); mRNA	gi|7662309	0.014	4.645
59	Homo sapiens chromosome 11 genomic contig; alternate assembly (based on Celera assembly)	gi|89034479	0.014	4.641
60	Homo sapiens brain expressed X-linked 2 (BEX2). mRNA	gi|50658085	0.014	4.019
61	PREDICTED: hypothetical protein	gi|114632931	0.015	5.027
62	Homo sapiens eukaryotic translation initiation factor 4A; isoform 2 (EIF4A2); mRNA	gi|83700234	0.016	4.12
63	PREDICTED: Homo sapiens hypothetical LOC644096 (LOC644096). mRNA	gi|113428589	0.016	15.746
64	PREDICTED: Homo sapiens similar to block of proliferation 1 (LOC727967); mRNA	gi|113420239	0.016	10.077
65	Homo sapiens calsyntenin 1 (CLSTN1) transcript variant 2 mRNA	gi|57242754	0.017	4.842
66	Homo sapiens myosin. heavy chain 9. non-muscle (MYH9)	NM_002473	0.017	3.905
67	omo sapiens splicing factor. arginine/serine-rich 10 (SFRS10)	NM_004593	0.017	3.813
68	Homo sapiens chromosome 6 open reading frame 153 (C6orf153)	NM_033112	0.017	4.581
69	Homo sapiens ribosomal protein S16 (RPS16); mRNA	gi|71482588	0.017	6.29
70	Homo sapiens zinc finger protein 671 (ZNF671); mRNA	gi|13376239	0.017	6.551
71	Homo sapiens chromosome 12 genomic contig reference assembly	gi|89035619	0.017	6.37
72	voltage-dependent anion channel 3	gi|25188179	0.018	4.967
73	Homo sapiens proprotein convertase subtilisin/kexin type 1 inhibitor (PCSK1N) mRNA	gi|20336240	0.018	4.197
74	Homo sapiens pogo transposable element with KRAB domain (POGK). mRNA	gi|22027479	0.018	2.947
75	Homo sapiens coenzyme Q4 homolog (S. cerevisiae) (COQ4) mRNA	gi|7705806	0.019	4.645
76	Homo sapiens chromosome 1 open reading frame 89 (C1orf89); mRNA	gi|34147392	0.019	5.958
77	PREDICTED: Homo sapiens SPEG complex locus (SPEG) mRNA	gi|113414262	0.019	4.106
78	Homo sapiens astrotactin 2 (ASTN2); transcript variant 3; mRNA	gi|46488918	0.019	3.48
79	PREDICTED: Homo sapiens hypothetical protein LOC146909. transcript variant 4 (LOC146909). mRNA	gi|113427446	0.019	3.888
81	kinesin-associated protein 3 [Homo sapiens]	gi|18105054	0.020	7.387
82	Homo sapiens mitochondrial ribosomal protein S24 (MRPS24); nuclear gene encoding mitochondrial protein; mRNA	gi|15721936	0.020	3.801
83	Homo sapiens chromosome 9 genomic contig reference assembly	gi|51467290	0.020	3.272
84	GDP dissociation inhibitor 1 [Pongo pygmaeus]	gi|33354069	0.020	2.031
106	hs low density lipoprotein-related protein associated protein 1 (LRPAP1).	gi|4505021	0.022	5.439
107	cytoplasmic dynein 1 heavy chain 1 [Homo sapiens]	gi|33350932	0.022	2.329
108	Homo sapiens Y box binding protein 1 (YBX1). mRNA	gi|34098945	0.023	18.198
109	CDA02 protein [Homo sapiens]	gi|14042941	0.023	2.001
110	Homo sapiens transmembrane protein 53 (TMEM53); mRNA	gi|42734433	0.023	5.752
111	frizzled 1 [Homo sapiens]	gi|4503825	0.023	2.9
112	Homo sapiens nischarin (NISCH); mRNA	gi|66472381	0.024	2.875
113	Homo sapiens amyloid beta (A4) precursor protein-binding; family B; member 1 (Fe65) (APBB1); transcript variant 1; mRNA	gi|22035552	0.025	2.781
114	tumor differentially expressed 2-like [Homo sapiens]	gi|71834872	0.025	3.831
115	Homo sapiens RAS dexamethasone-induced 1 (RASD1) mRNA	gi|22027484	0.025	10.887
116	Homo sapiens ribosomal protein L27 (RPL27); mRNA	gi|78190461	0.025	8.883
117	Homo sapiens roundabout. axon guidance receptor. homolog 3 (Drosophila) (ROBO3). mRNA	gi|48476181	0.025	11.047
118	Homo sapiens CD81 molecule (CD81); mRNA	gi|62240999	0.026	3.357
119	Homo sapiens serpin peptidase inhibitor clade H (heat shock protein 47) member 1 (collagen binding protein 1) (SERPINH1) mRNA	gi|32454740	0.026	5.761
120	Homo sapiens GNAS complex locus (GNAS); transcript variant 4; mRNA	gi|7706588	0.026	10.485
121	Homo sapiens hypothetical protein FLJ22795 (FLJ22795); mRNA	gi|13443001	0.026	10.13
122	omo sapiens splicing factor. arginine/serine-rich 10 (SFRS10)	NM_004593	0.027	3.778
123	Homo sapiens ferritin. heavy polypeptide 1 (FTH1). mRNA	gi|56682958	0.027	4.952
124	Hypothetical protein LOC55219	gi|21595329	0.027	3.792
125	perA protein - Escherichia coli	gi|2125989	0.027	3.699
126	DCTN2 protein [Homo sapiens]	gi|15559432	0.027	2.132
127	Homo sapiens chromatin modifying protein 5 (CHMP5). mRNA	gi|20127557	0.028	4.248
128	Homo sapiens zinc finger protein 646 (ZNF646); mRNA	gi|41281440	0.028	4.34
129	Homo sapiens chromosome 18 genomic contig reference assembly	gi|29823171	0.028	10.177
130	no blast result	064019_019_N12	0.028	6.005
133	Homo sapiens myosin. light chain 6B. alkali. smooth muscle and non-muscle (MYL6B). mRNA	gi|89111136	0.029	2.358
134	Unknown (protein for IMAGE:3881197) [Homo sapiens]	gi|17390940	0.029	2.746
135	Homo sapiens kinesin family member 5B (KIF5B) mRNA	gi|4758647	0.029	4.817
136	PREDICTED: Homo sapiens similar to Serine/threonine-protein kinase PRKX (Protein kinase PKX1) (LOC389906); mRNA	gi|113429692	0.029	4.354
137	Homo sapiens esterase D/formylglutathione hydrolase (ESD); mRNA	gi|33413399	0.029	5.262
138	Homo sapiens multiple EGF-like-domains 6 (MEGF6) mRNA	gi|82524843	0.029	5.869
139	Homo sapiens Fas (TNFRSF6)-associated via death domain (FADD). mRNA	gi|22219473	0.030	3.31
140	Stathmin 1 **	gi|15680064	0.030	3.303
141	zinc finger protein 259	gi|30582123	0.031	2.035
142	Homo sapiens RAB11B member RAS oncogene family (RAB11B) mRNA	gi|4758985	0.031	2.783
143	Homo sapiens chromosome 7 genomic contig. reference assembly	gi|89024890	0.031	5.55
144	Homo sapiens WAS protein family. member 1 (WASF1). transcript variant 4. mRNA	gi|68161503	0.031	5.03
145	CDC42 effector protein 1 isoform b	gi|34452717	0.031	9.451
147	Homo sapiens WW domain binding protein 5 (WBP5); transcript variant 1; mRNA	gi|55925651	0.031	2.87
148	S62594 replication licensing factor MCM3 - human	gi|2135007	0.032	3.634
149	Homo sapiens docking protein 5 (DOK5); mRNA	gi|58331236	0.032	4.218
150	zinc finger protein 136 [Homo sapiens]	gi|4507987	0.032	4.256
151	Homo sapiens chromosome 19 genomic contig. reference assembly	gi|37552371	0.032	4.892
153	Homo sapiens chromosome 19 open reading frame 43 (C19orf43); mRNA	gi|34147352	0.033	3.707
154	Homo sapiens neural proliferation; differentiation and control; 1 (NPDC1); mRNA	gi|20149616	0.033	4.056
155	solute carrier family 25; member 39 isoform a [Homo sapiens]	gi|219555665	0.033	3.406
156	Homo sapiens chromosome 12 genomic contig; alternate assembly (based on Celera assembly)	gi|89036563	0.033	2.796
157	Homo sapiens solute carrier family 38 member 3 (SLC38A3) mRNA	gi|40795668	0.034	2.81
158	truncated nuclear factor of kappa light polypeptide gene enhancer in B-cells inhibitor- epsilon [Homo sapiens]	gi|54288827	0.035	2.039
159	Homo sapiens golgi SNAP receptor complex member 2 (GOSR2); transcript variant A; mRNA	gi|60499005	0.035	3.13
160	cytochrome c oxidase subunit IV isoform 1 precursor [Homo sapiens]	gi|4502981	0.036	2.092
195	Homo sapiens butyrobetaine (gamma); 2-oxoglutarate dioxygenase (gamma-butyrobetaine hydroxylase) 1 (BBOX1); mRNA	gi|4502368	0.036	3.39
196	Homo sapiens glutathione transferase zeta 1 (maleylacetoacetate isomerase) (GSTZ1) transcript variant 1 mRNA	gi|22202623	0.036	7.049
198	Homo sapiens jumonji; AT rich interactive domain 1B (JARID1B); mRNA	gi|57242795	0.037	2.404
199	Homo sapiens activating signal cointegrator 1 complex subunit 3-like 1 (ASCC3L1); mRNA	gi|40217846	0.038	3.863
200	Homo sapiens Y box binding protein 1 (YBX1). mRNA	gi|34098945	0.038	6.729
202	Homo sapiens eukaryotic translation initiation factor 2A. 65kDa (EIF2A). mRNA	gi|83656780	0.038	2.556
205	Homo sapiens cysteine and glycine-rich protein 2 (CSRP2). mRNA	NM_001321	0.039	2.666
206	Homo sapiens phosphoglycerate dehydrogenase like 1 (PHGDHL1); mRNA	gi|31342615	0.040	3.609
208	unnamed protein product [Homo sapiens]	gi|193785653	0.040	2.585
209	Homo sapiens hypothetical protein MGC42174 (MGC42174). mRNA	gi|32964831	0.040	14.986
210	Homo sapiens Y box binding protein 1 (YBX1). mRNA	gi|34098945	0.040	12.705
211	Homo sapiens P450 (cytochrome) oxidoreductase (POR); mRNA	gi|94721355	0.040	10.739
212	Homo sapiens synaptotagmin V (SYT5). mRNA	gi|92859637	0.040	60.504
213	chondrosarcoma-associated protein 2 [Homo sapiens]	gi|5901878	0.041	3.074
214	Homo sapiens Fas (TNFRSF6)-associated via death domain (FADD). mRNA	gi|22219473	0.041	2.297
215	Homo sapiens N-ethylmaleimide-sensitive factor attachment protein. alpha (NAPA). mRNA	gi|47933378	0.041	4.342
216	claudin 9 [Homo sapiens]	gi|11141861	0.041	4.139
217	Homo sapiens zinc finger protein 71 (ZNF71); mRNA	gi|34147502	0.041	3.548
218	Homo sapiens myosin. light chain 6B. alkali. smooth muscle and non-muscle (MYL6B). mRNA	gi|89111136	0.041	2.359
221	Homo sapiens chromosome 19 genomic contig. alternate assembly (based on Celera assembly)	gi|89057118	0.042	4.643
222	Homo sapiens myosin; light chain 6B; alkali; smooth muscle and non-muscle (MYL6B); mRNA	gi|89111136	0.042	2.908
223	Homo sapiens insulin-like growth factor binding protein 2; 36kDa (IGFBP2); mRNA	gi|55925575	0.042	2.547
224	Homo sapiens Y box binding protein 1 (YBX1). mRNA	gi|34098945	0.043	12.884
225	Homo sapiens nuclear mitotic apparatus protein 1 (NUMA1) mRNA	gi|71361681	0.043	10.397
226	MIP-T3 [Homo sapiens]	gi|8572065	0.043	2.591
227	Homo sapiens chromosome 10 genomic contig alternate assembly (based on Celera assembly)	gi|89033689	0.043	5.825
228	Homo sapiens solute carrier family 25 (mitochondrial carrier; adenine nucleotide translocator) member 6 (SLC25A6) mRNA	gi|27764862	0.044	2.82
229	Homo sapiens clathrin; light polypeptide (Lca) (CLTA); transcript variant brain-specific; mRNA	gi|6005992	0.044	2.307
231	Homo sapiens growth hormone inducible transmembrane protein (GHITM); mRNA	gi|7657479	0.044	2.333
232	Unknown (protein for IMAGE:3906958)	gi|16041670	0.044	3.343
233	Homo sapiens exostoses (multiple) 1 (EXT1) mRNA	gi|46370065	0.045	4.856
234	Homo sapiens SPECC1-like (SPECC1L). mRNA	gi|51036581	0.045	3.251
236	Homo sapiens similar to RIKEN cDNA B230118G17 gene (MGC19604); transcript variant 1; mRNA	gi|72534753	0.045	14.246
237	Homo sapiens kelch domain containing 5 (KLHDC5); mRNA	gi|55749725	0.045	8.329
238	Ras association domain family 2 isoform 1 [Homo sapiens]	gi|25777677	0.045	3.574
240	SF3B3 protein [Homo sapiens]	gi|12653387	0.045	2.333
241	Homo sapiens RAB11 family interacting protein 4 (class II) (RAB11FIP4) mRNA	gi|54111426	0.045	4.504
243	Homo sapiens coactosin-like 1 (Dictyostelium) (COTL1). mRNA	gi|23510452	0.047	4.895
245	Homo sapiens PRP19/PSO4 pre-mRNA processing factor 19 homolog (S. cerevisiae) (PRPF19); mRNA	gi|34222313	0.047	12.004
246	hypothetical protein MGC2803 [Homo sapiens]	gi|13128992	0.047	4.433
247	Homo sapiens Enah/Vasp-like (EVL); mRNA	gi|50726984	0.047	4.01
249	Homo sapiens zinc finger protein 238 (ZNF238). transcript variant 2. mRNA	gi|45439300	0.048	3.707
250	Homo sapiens nucleotide binding protein 2 (MinD homolog E. coli) (NUBP2) mRNA	gi|6912539	0.048	3.246
253	Homo sapiens chromosome 17 genomic contig. alternate assembly (based on Celera assembly)	NW_926918	0.048	2.732
254	Homo sapiens coiled-coil-helix-coiled-coil-helix domain containing 8 (CHCHD8); mRNA	gi|46198303	0.048	2.958
255	Homo sapiens PTK9L protein tyrosine kinase 9-like (A6-related protein) (PTK9L); mRNA	gi|40068460	0.048	2.041
256	Maf-related DNA binding protein [Homo sapiens]	gi|6429134	0.049	2.004
257	Homo sapiens lamin A/C (LMNA). transcript variant 2	NM_005572	0.050	3.233
258	Homo sapiens high-mobility group nucleosome binding domain 1 (HMGN1); mRNA	gi|48255932	0.050	4.428
259	complement component 1; s subcomponent [Homo sapiens]	gi|4502495	0.050	7.098
260	tetraspanin 7 [Homo sapiens]	gi|21265104	0.050	5.311
